# Supplementary material for: Improved high-molecular-weight DNA extraction, nanopore sequencing and metagenomic assembly from the human gut microbiome
Source: Springer Nature journal article supplement (doi:10.1038/s41596-020-00424-x), 2020-12-04
Supplement: MOESM3 [file 41596_2020_424_MOESM3_ESM10.xlsx]

## Sheet: Supplementary Table 1
Supplementary Table 1: Summary of HMW DNA Extraction Methods
Sample type	DNA extraction method	Lysis Method	Read N50 (kbp)	Reference
Bacterial isolate (Vibrio parahaemolyticus MVP1)	Sokolov extraction method [19]	Chemical (SDS)	10.9	1
Bacterial isolate (Klebsiella pneumoniae)	Agencourt GenFind V2	Chemical (Buffer LBC*)	22.9	2
Bacterial isolate (Escherichia coli K-12)	QIAGEN Genomic-tip 20/G	Chemical (Lysozyme)	8.9	3
Mock community	ZymoBIOMICS DNA Miniprep extraction kit	Physical (bead beating), Chemical (Lysis Solution*)	5.4	4
Mammalian (GM12878 Utah/Ceph cell line)	Qiagen QIAamp DNA mini kit	Physical (bead beating), Chemical (Buffer ATL*)	10.6	5
Mammalian (Parochlus steinenii)	Qiagen DNeasy Tissue Kit	Chemical (Buffer ATL*)	12.4	6
Fish (two sp of Fundulus - fresh)	Agilent Genomic DNA Isolation kit	Chemical (Solution 2*)	5.8, 13.0	7
Fish (two sp of Fundulus - frozen)	Qiagen Gentra Puregene Tissue Kit	Chemical (Cell Lysis Solution*)	3.4, 11.7	7
Stool	Adapted Qiagen PowerSoil DNA Isolation Kit protocol	Physical (bead beating), Chemical (Solution C1*)	2	8
Stool	Improved HMW extraction presented here	Chemical (Metapolyzyme, Qiagen Lytic Enzyme, SDS)	5.9	9
Plants (two sp of angiosperm)	Novel protocol	Physical (grinding), Chemical (CTAB)	22.6, 20.7	10
Yeast	Qiagen Genomic-tip 100/G column	Physical (vortex), Chemical (lyticase)	NR	11
Soil	Novel soil/sediment HMW Extraction Protocol	Physical (grinding), Chemical (CTAB)	NR	12
Hot spring	Comparison of 5 environmental-specific protocols	Chemical (SDS, Lysozyme, Tween 80)	NR	13
Microbial mat	Novel protocol	Physical (grind and blend), Chemical (SDS)	NR	14
Fungi	Qiagen DNeasy PowerMax Soil Kit	Physical (bead beat), Chemical (Solution C1*)	NR	15
Ocean sediment	Modified SDS-extraction	Physical (bead beat), Chemical (SDS, lysozyme)	NR	16
Planarian	Novel protocol	Physical (vortex), Chemical (N-lauroylsarcosine, CTAB)	NR	17
Blood, semen, vaginal swabs	Novel protocols	Chemical (SDS)	NR	18
NR = not reported
*details not available for proprietary reagent
[1]: Gan HM and Austin CM. Nanopore long reads enable the first complete genome assembly of a Malaysian Vibrio parahaemolyticus isolate bearing the pVa plasmid associated with acute hepatopancreatic necrosis disease [version 1; peer review: 1 approved with reservations, 1 not approved]. F1000Research 2019, 8:2108 (https://doi.org/10.12688/f1000research.21570.1)
[2]: Wick, R. R., Judd, L. M., Gorrie, C. L., & Holt, K. E. (2017). Completing bacterial genome assemblies with multiplex MinION sequencing. Microbial genomics, 3(10), e000132. https://doi.org/10.1099/mgen.0.000132
[3]: Lu H, Giordano F, Ning Z. Oxford Nanopore MinION Sequencing and Genome Assembly. Genomics Proteomics Bioinformatics. 2016;14(5):265-279. doi:10.1016/j.gpb.2016.05.004.
[4]: Samuel M Nicholls, Joshua C Quick, Shuiquan Tang, Nicholas J Loman, Ultra-deep, long-read nanopore sequencing of mock microbial community standards, GigaScience, Volume 8, Issue 5, May 2019, giz043, https://doi.org/10.1093/gigascience/giz043
[5]: Jain, M., Koren, S., Miga, K. et al. Nanopore sequencing and assembly of a human genome with ultra-long reads. Nat Biotechnol 36, 338–345 (2018). https://doi.org/10.1038/nbt.4060
[6]: Shin, S. C., Kim, H., Lee, J. H., Kim, H. W., Park, J., Choi, B. S., Lee, S. C., Kim, J. H., Lee, H., & Kim, S. (2019). Nanopore sequencing reads improve assembly and gene annotation of the Parochlus steinenii genome. Scientific reports, 9(1), 5095. https://doi.org/10.1038/s41598-019-41549-8
[7]: Lisa K Johnson, Ruta Sahasrabudhe, James Anthony Gill, Jennifer L Roach, Lutz Froenicke, C Titus Brown, Andrew Whitehead, Draft genome assemblies using sequencing reads from Oxford Nanopore Technology and Illumina platforms for four species of North American Fundulus killifish, GigaScience, Volume 9, Issue 6, June 2020, giaa067, https://doi.org/10.1093/gigascience/giaa067
[8]: Bertrand D. et al. Nanopore sequencing enables high-resolution analysis of resistance determinants and mobile elements in the human gut microbiome. bioRxiv 456905 (2018) doi: https://doi.org/10.1101/456905
[9]: Moss, E.L., Maghini, D.G. & Bhatt, A.S. Complete, closed bacterial genomes from microbiomes using nanopore sequencing. Nat Biotechnol 38, 701–707 (2020). https://doi.org/10.1038/s41587-020-0422-6
[10]: Vaillancourt B, Buell CR. High molecular weight DNA isolation method from diverse plant species for use with Oxford Nanopore sequencing. bioRxiv 783159 (2019) doi: https://doi.org/10.1101/783159
[11]: Liem, M., Jansen, H. J., Dirks, R. P., Henkel, C. V., van Heusden, G., Lemmers, R., Omer, T., Shao, S., Punt, P. J., & Spaink, H. P. (2017). De novo whole-genome assembly of a wild type yeast isolate using nanopore sequencing. F1000Research, 6, 618. https://doi.org/10.12688/f1000research.11146.2
[12]: Lee, S., & Hallam, S. J. (2009). Extraction of high molecular weight genomic DNA from soils and sediments. Journal of visualized experiments : JoVE, (33), 1569. https://doi.org/10.3791/1569
[13]: Comparison of Metagenomic DNA Extraction Methods for Soil Sediments of High Elevation Puga Hot Spring in Ladakh, India to Explore Bacterial Diversity, https://doi.org/10.1080/01490451.2015.1128995
[14]: Bey BS, Fichot EB, Norman RS. Extraction of high molecular weight DNA from microbial mats. J Vis Exp. 2011;(53):e2887. Published 2011 Jul 7. doi:10.3791/2887
[15]: Fauchery L, Uroz S, Buée M, Kohler A. Purification of Fungal High Molecular Weight Genomic DNA from Environmental Samples. Methods Mol Biol. 2018;1775:21-35. doi:10.1007/978-1-4939-7804-5_3
[16]: Natarajan, V. P., Zhang, X., Morono, Y., Inagaki, F., & Wang, F. (2016). A Modified SDS-Based DNA Extraction Method for High Quality Environmental DNA from Seafloor Environments. Frontiers in microbiology, 7, 986. https://doi.org/10.3389/fmicb.2016.00986
[17]: Grohme MA, Vila-Farré M, Rink JC. Small- and Large-Scale High Molecular Weight Genomic DNA Extraction from Planarians. Methods in Molecular Biology (Clifton, N.J.). 2018 ;1774:267-275. DOI: 10.1007/978-1-4939-7802-1_7.
[18]: Schneider PM. Recovery of high-molecular-weight DNA from blood and forensic specimens. Methods Mol Biol. 1998;98:1-7. doi:10.1385/0-89603-443-7:1
[19]: Sokolov EP. 2000. An improved method for DNA isolation from mucopolysaccharide-rich molluscan tissues. J Molluscan Stud 66:573–575. doi:10.1093/mollus/66.4.573.
