# Supplementary material for: Improved high-molecular-weight DNA extraction, nanopore sequencing and metagenomic assembly from the human gut microbiome
Source: Springer Nature journal article supplement (doi:10.1038/s41596-020-00424-x), 2020-12-04
Supplement: MOESM4 [file 41596_2020_424_MOESM4_ESM11.xlsx]

## Sheet: Sheet1
Supplementary Table 2: Lytic Enzyme Activities
Enzyme	Role	Activity	Found in
Lyticase	degrades yeast cell walls	hydrolyzes poly-β(1→3)-glucose (hydrolyzes cell wall glucan)	MetaPolyzyme, Lytic Enzyme Solution*
Achromopeptidase	lyses lysozyme-resistant Gram-positive bacteria	lysyl endopeptidase, preferential cleavage:Lys-, including-Lys-Pro-	MetaPolyzyme
Chitinase	degrades chitin in fungal cell walls	hydrolysis of (GlcNAc)	MetaPolyzyme
Lysostaphin	lyses Gram-positive bacteria, especially Staphylococcus	cleaves polyglycine cross-links in peptidoglycans	MetaPolyzyme
Lysozyme	lyses Gram-positive bacteria	glycoside hydrolase, hydrolysis of 1,4-beta-linkages between N-acetylmuramic acid and N-acetyl-D-glucosamine residues in peptidoglycan	MetaPolyzyme
Mutanolysin	lyses Gram-positive bacteria	N-acetylmuramidase, cleaves the β-N-acetylmuramyl-(1→4)-N-acetylglucosamine linkage of peptidoglycan-polysaccharide	MetaPolyzyme
*additional enzymes may be present but reagent is proprietary
